# Supplementary material
Source: ML conference proceedings conference paper supplement (https://proceedings.mlr.press/v32/wangc14.html)
Supplement: Supplementary file 1 [file wangc14-supp.zip › FIML_ICML_suplementary.pdf]

---

**Proof of Lemma 2.**

*Proof.* Let  $\theta$  be the coordinate of  $p \in \mathcal{U} \subset \mathcal{M}^n$  under some smooth coordinate map  $\varphi_{\mathcal{U}}$  and  $\gamma$  be the coordinate of  $f(p) \in \mathcal{U}' \subset \mathcal{N}^m$  under some smooth coordinate map  $\varphi_{\mathcal{U}'}$ . Since  $p'$  approaches  $p$ , we have  $\theta' = \theta + d\theta$ , where  $\theta'$  is the coordinate of  $p'$  under the coordinate map  $\varphi_{\mathcal{U}}$  and  $d\theta$  is an infinitesimal small change approaching 0. Furthermore, since  $f : \mathcal{M}^n \rightarrow \mathcal{N}^m$  is a differential map, the function  $\varphi_{\mathcal{U}'} \circ f \circ \varphi_{\mathcal{U}}^{-1} : \Theta \rightarrow \Gamma$ , which we will denote by  $g$ , is also differentiable. According to the Taylor expansion, we have  $\gamma' = g(\theta') = g(\theta + d\theta) = g(\theta) + \nabla g(\theta)d\theta + R_g(d\theta, \theta) = \gamma + \mathbf{J}d\theta + R_g(d\theta, \theta)$ , where  $\gamma'$  is the coordinate of  $f(p')$  under the coordinate map  $\varphi_{\mathcal{U}'}$ ,  $\mathbf{J}$  is the Jacobian matrix of the function  $g$  at point  $\theta$  and  $R_g(d\theta, \theta)$  is the remainder term of linear approximation. Finally, according to the definition of pullback metric, we have  $\lim_{d\theta \rightarrow 0} \frac{d_{\mathbf{G}(\gamma)}(\gamma', \gamma)}{d_{\mathbf{G}^*(\theta)}(\theta', \theta)} = \lim_{d\theta \rightarrow 0} \frac{(\mathbf{J}d\theta + R_g(d\theta, \theta))^T \mathbf{G}(\gamma)(\mathbf{J}d\theta + R_g(d\theta, \theta))}{d\theta^T \mathbf{J}^T \mathbf{G}(\gamma) \mathbf{J} d\theta} = 1$ . This ends the proof.  $\square$
